# Supplementary material for: Comparative Study Highlights the Potential of Spectral Deconvolution for Fucoxanthin Screening in Live Phaeodactylum tricornutum Cultures
Source: MDPI journal article supplement (doi:10.3390/md20010019), 2021-12-23
Supplement: s1 [file s1]

# Supplementary Materials:

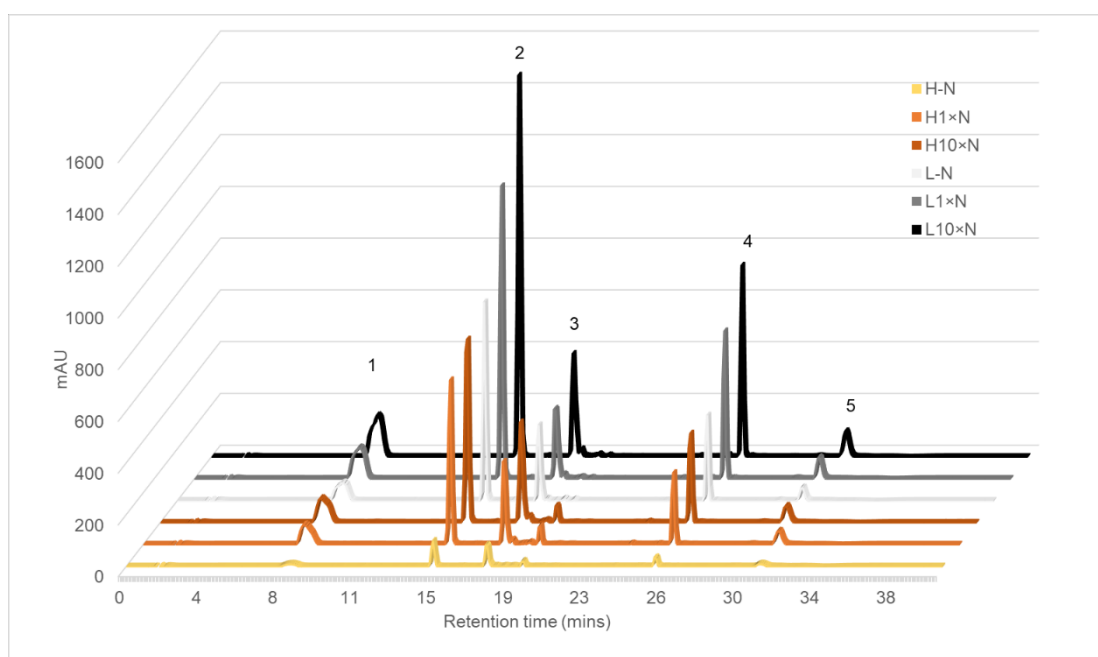

**Figure S1.** Representative HPLC chromatograms of *Phaeodactylum tricornutum* extract from each treatment group. Treatment abbreviations are as follows: nitrate-free ASW media (-N), standard (1xN) nitrate media, or media with 10× nitrate (10xN) and either 10 (LL) or 200 (HL)  $\mu\text{mol photons m}^{-2} \text{s}^{-1}$ . Peaks numbers are represented as follows: 1: Chlorophyll c; 2: Fucoxanthin; 3: Diadinoxanthin; 4: Chlorophyll a; 5: β-carotene.
